# Supplementary material for: EGDMA- and TRIM-Based Microparticles Imprinted with 5-Fluorouracil for Prolonged Drug Delivery
Source: MDPI journal article supplement (doi:10.3390/polym14051027), 2022-03-04
Supplement: s1 [file s1]

Supplementary

# EGDMA- and TRIM-Based Microparticles Imprinted with 5-Fluorouracil for Prolonged Drug Delivery

Michał Cegłowski <sup>1,\*</sup>, Joanna Kurczewska <sup>1</sup>, Aleksandra Lusina <sup>1</sup>, Tomasz Nazim <sup>1</sup> and Piotr Ruszkowski <sup>2</sup>

<sup>1</sup> Faculty of Chemistry, Adam Mickiewicz University, 61-614 Poznan, Poland; asiaw@amu.edu.pl (J.K.); aleksandra.lusina@amu.edu.pl (A.L.); tomasz.nazim@amu.edu.pl (T.N.)

<sup>2</sup> Department of Pharmacology, Poznan University of Medical Sciences, 61-614 Poznan, Poland; pruszkowski@gmail.com

\* Correspondence: michal.ceglowski@amu.edu.pl; Tel.: +48-61-8291-799

## Figures

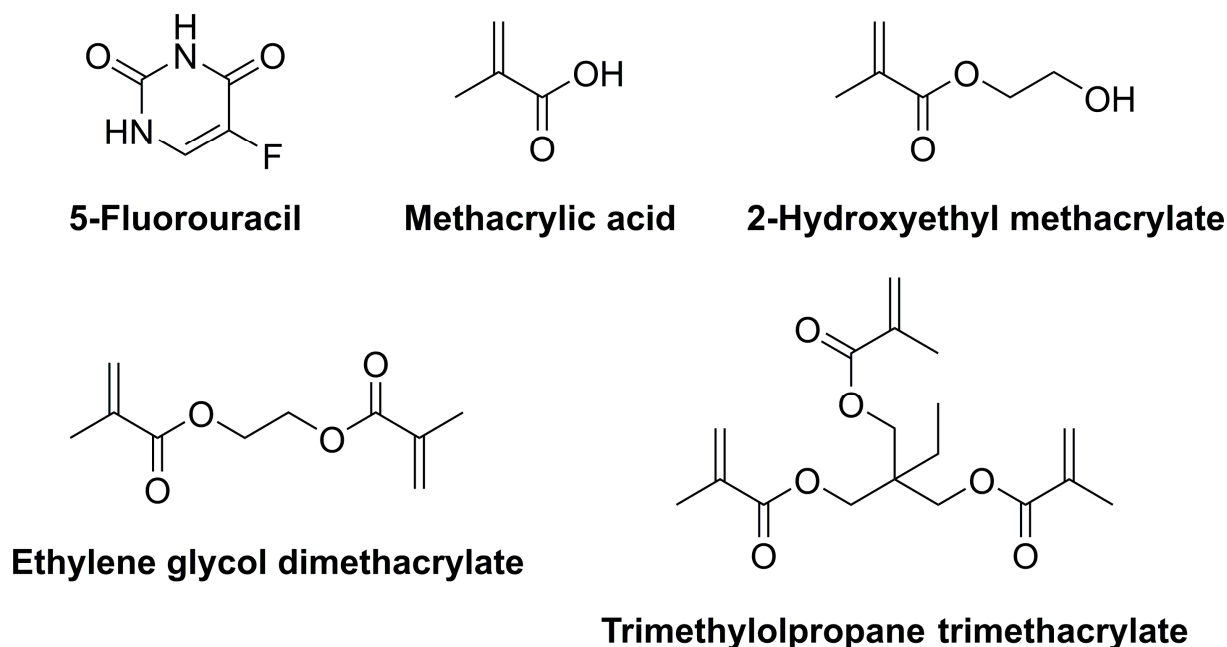

**Figure S1.** Chemical structures of 5- fluorouracil, functional monomers and cross-linkers.

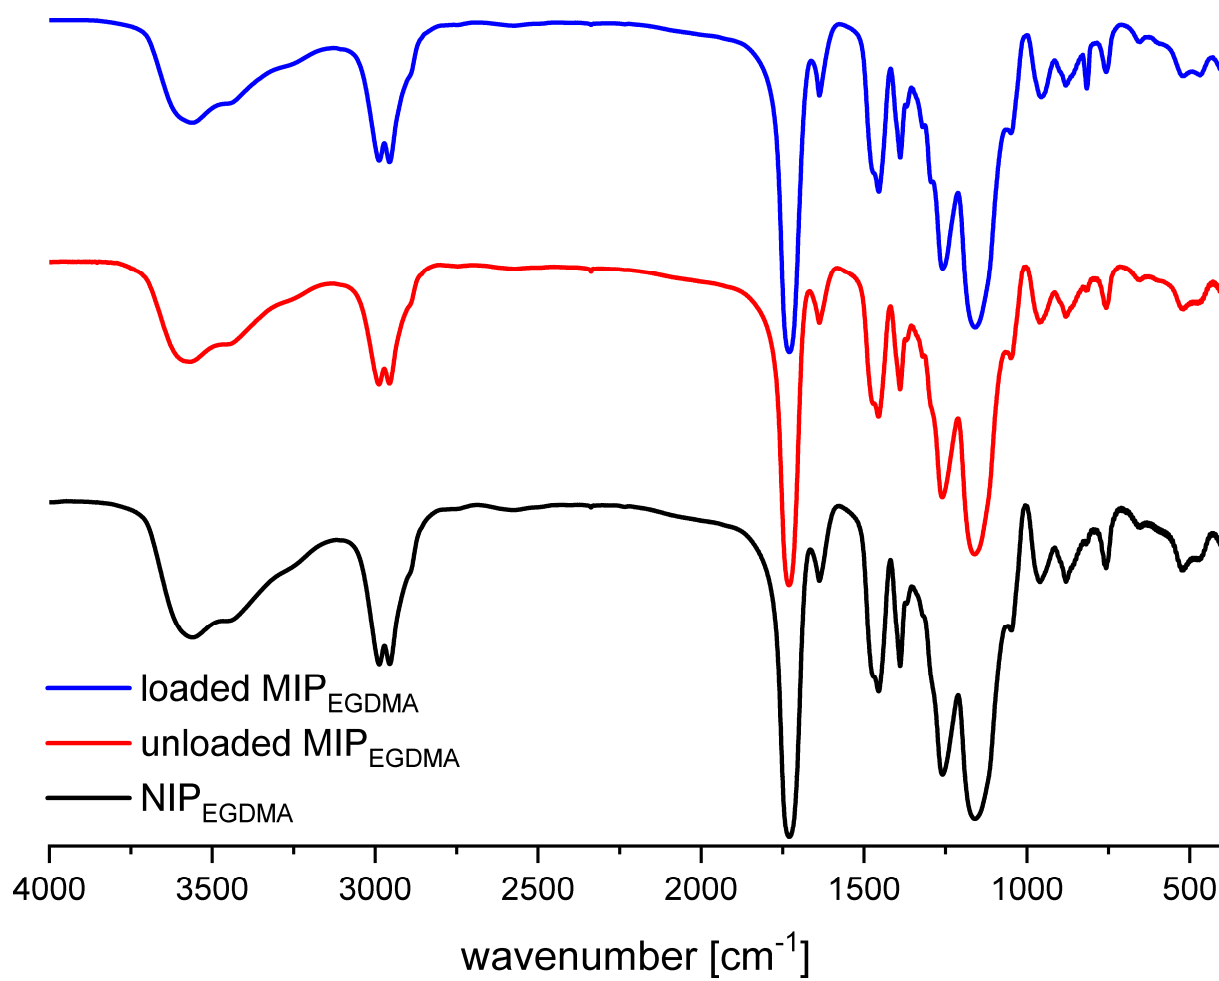

**Figure S2.** FT-IR spectra of loaded  $\text{MIP}_{\text{EGDMA}}$ , unloaded  $\text{MIP}_{\text{EGDMA}}$ , and  $\text{NIP}_{\text{EGDMA}}$ .

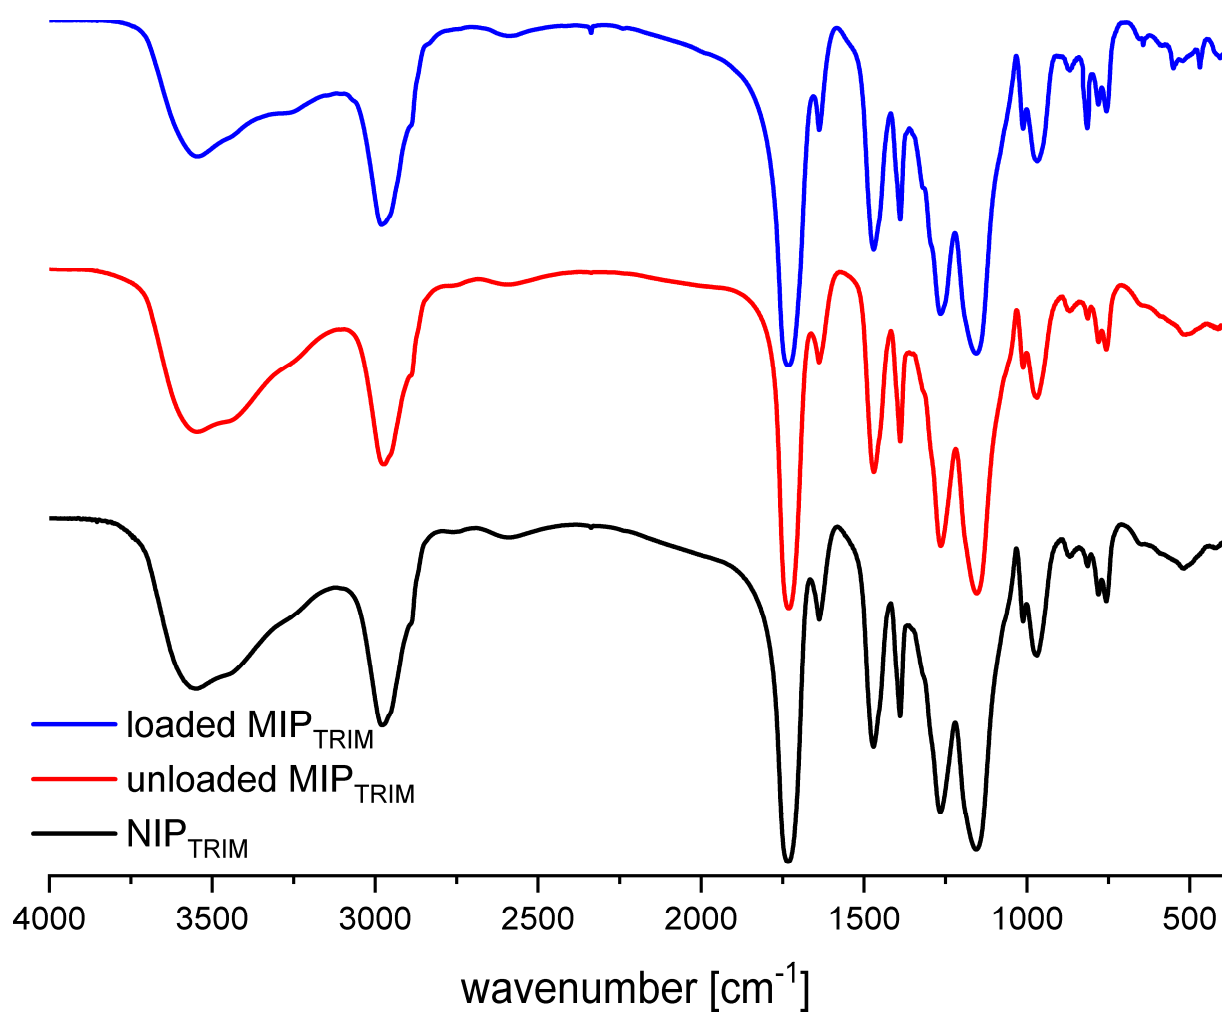

**Figure S3.** FT-IR spectra of loaded  $\text{MIP}_{\text{TRIM}}$ , unloaded  $\text{MIP}_{\text{TRIM}}$ , and  $\text{NIP}_{\text{TRIM}}$ .

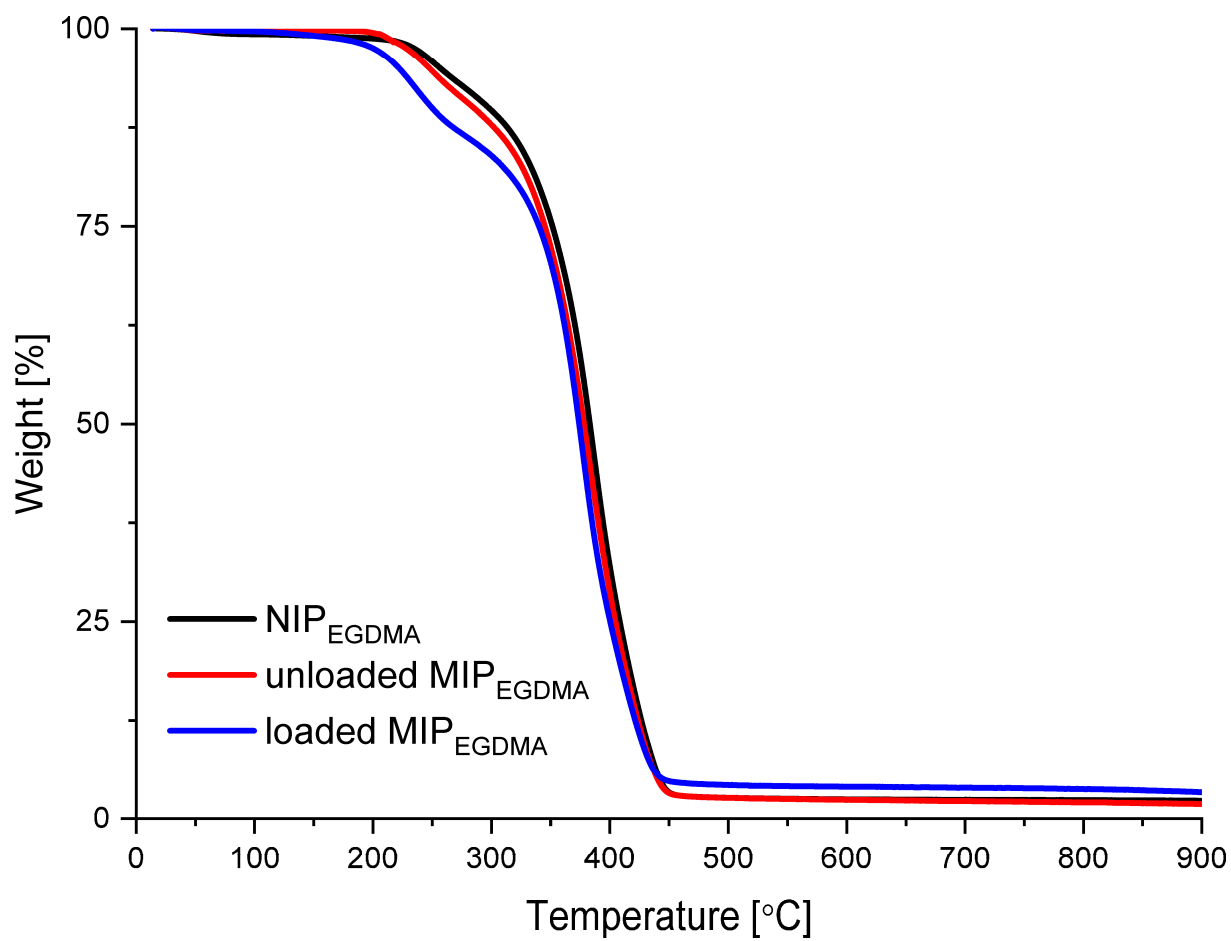

**Figure S4.** Results of thermogravimetric analysis for NIP<sub>EGDMA</sub>, unloaded MIP<sub>EGDMA</sub>, and loaded MIP<sub>EGDMA</sub>.

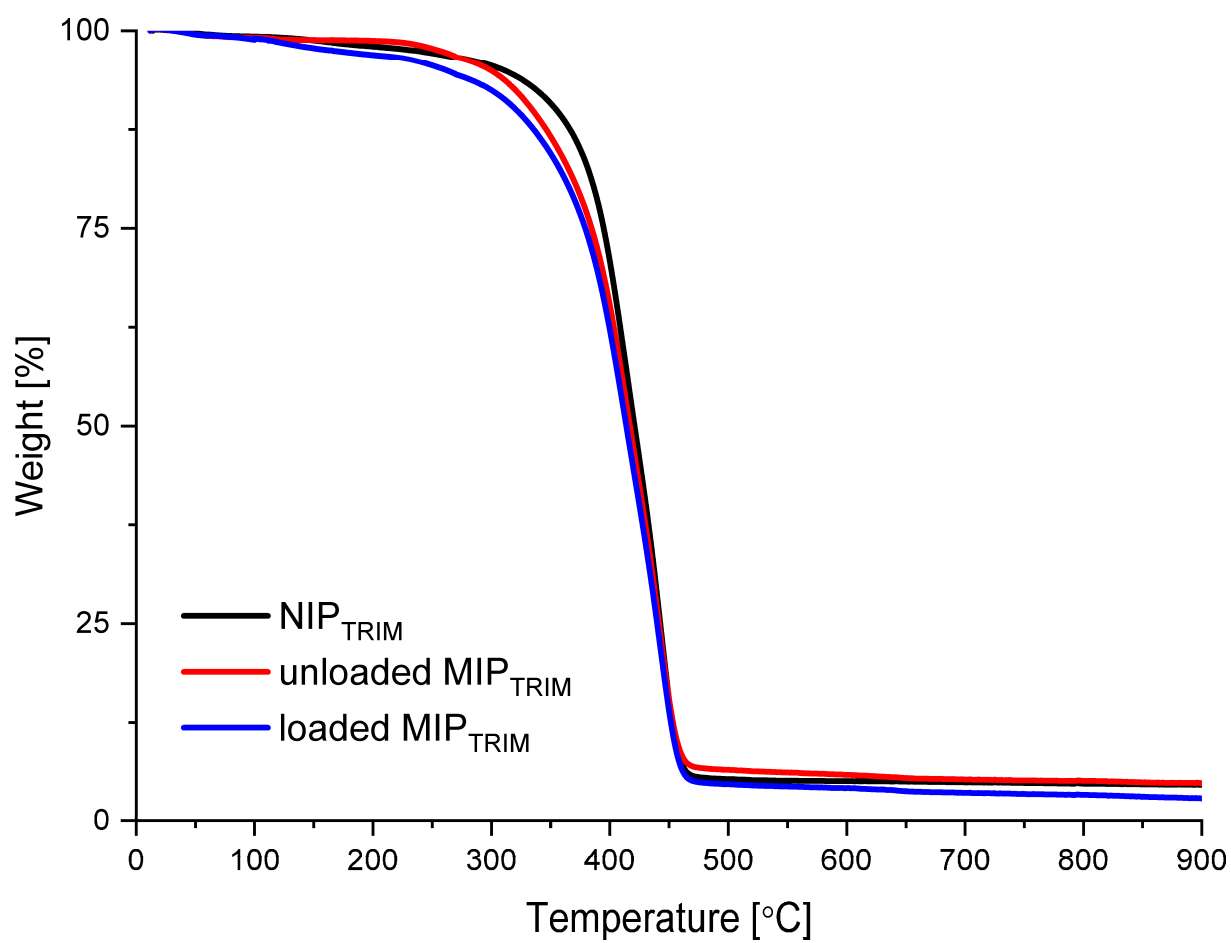

**Figure S5.** Results of thermogravimetric analysis for NIP<sub>TRIM</sub>, unloaded MIP<sub>TRIM</sub>, and loaded MIP<sub>TRIM</sub>.

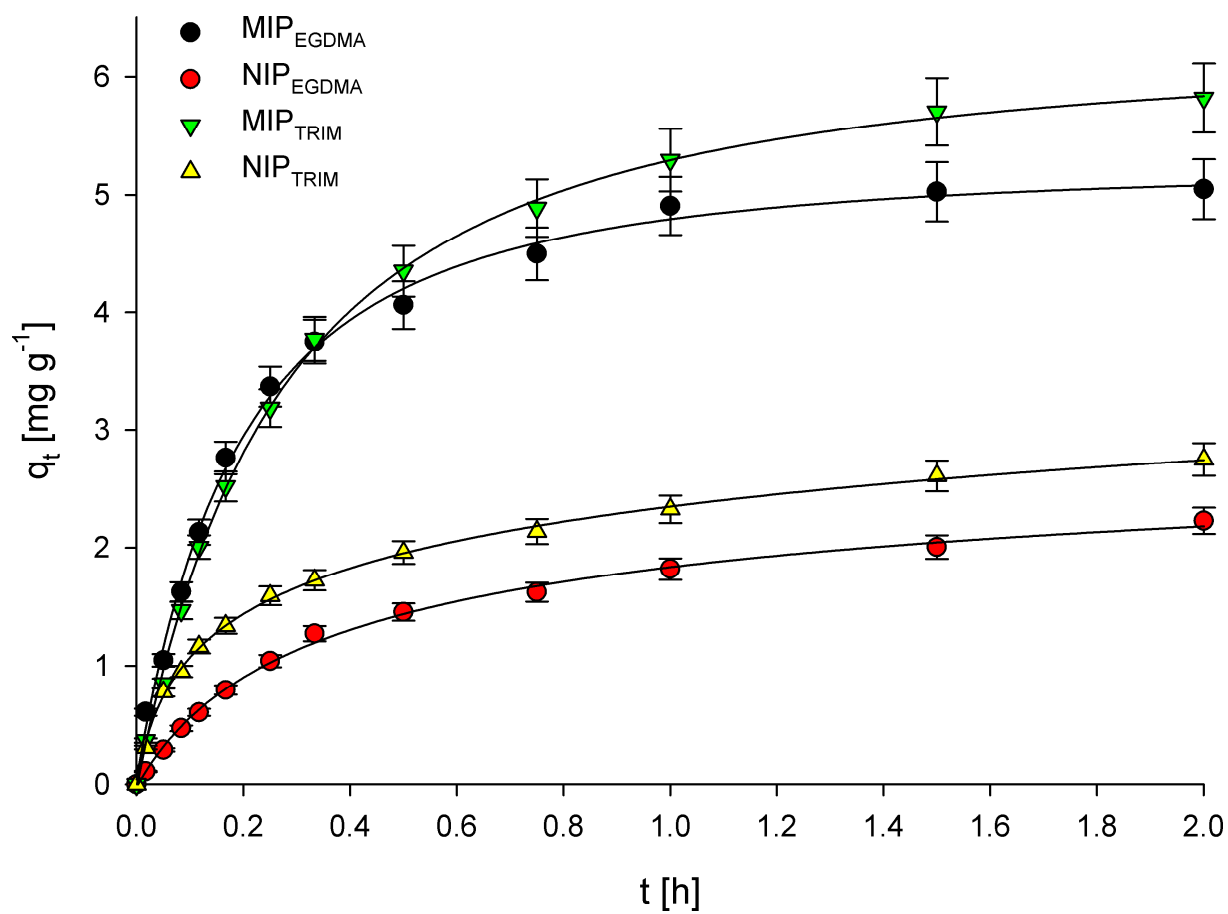

**Figure S6.** The relationship between  $q_t$  and  $t$  obtained for MIP<sub>EGDMA</sub>, NIP<sub>EGDMA</sub>, MIP<sub>TRIM</sub>, and NIP<sub>TRIM</sub> during adsorption kinetics experiments.
